# Supplementary material for: Towards a tunable and switchable water adhesion on a TiO2 nanotube film with patterned wettability
Source: Royal Society of Chemistry journal article supplement (doi:10.1039/b914630j), 2009-01-01
Supplement: b914630j.pdf [file b914630j.pdf]

Supplementary Material (ESI) for Chemical Communications

# Towards Tunable and Switchable Water Adhesion on TiO<sub>2</sub> Nanotube Film with Patterned Wettability

Daoai Wang, Ying Liu, Xinjie Liu, Feng Zhou,\* Weimin Liu, Qunji Xue

Lanzhou Institute of Chemical Physics, Chinese Academy of Sciences, Lanzhou 730000,

P. R. China

## Electronic Supplementary Information

Figure S1

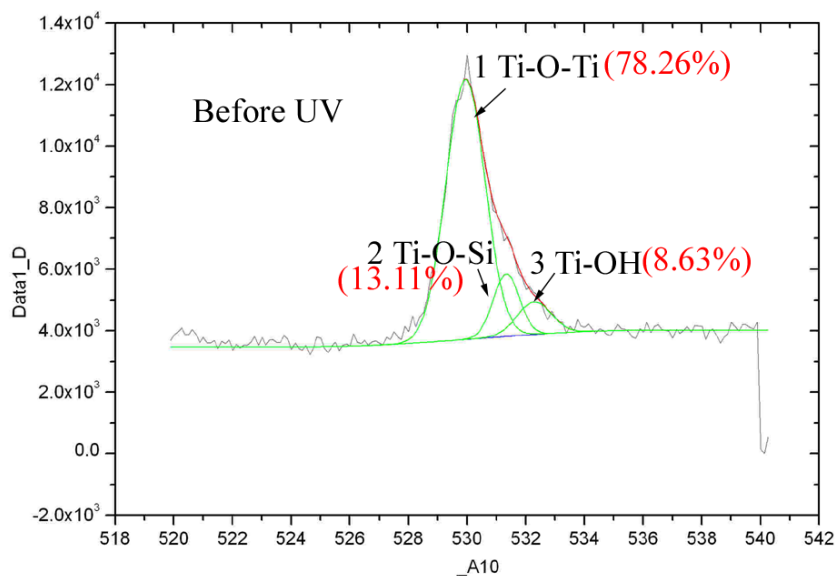

Fitting Results

| Peak # | Peak Type | AreaFitT    | FWHM    | MaxHeight  | CenterGrvty | AreaFITP |
|--------|-----------|-------------|---------|------------|-------------|----------|
| 1      | Gaussian  | 10475.12066 | 1.57446 | 8477.88484 | 529.71193   | 78.26287 |
| 2      | Gaussian  | 1754.13633  | 1.04549 | 2039.21696 | 531.10776   | 13.1057  |
| 3      | Gaussian  | 1155.27752  | 1.37221 | 1057.89205 | 532.05585   | 8.63144  |

13384.5345

**Figure S2**

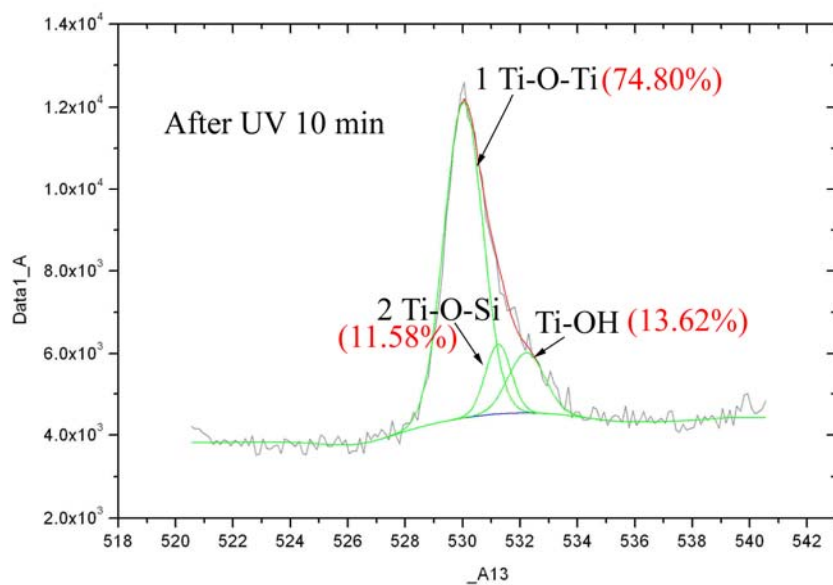

Fitting Results

| Peak #      | Peak Type | AreaFIT    | FWHM    | MaxHeight  | CenterGrvty | AreaFITP |
|-------------|-----------|------------|---------|------------|-------------|----------|
| 1           | Gaussian  | 9534.96832 | 1.57353 | 7721.1105  | 530.02627   | 74.79888 |
| 2           | Gaussian  | 1476.08622 | 1.03735 | 1727.57963 | 531.23886   | 11.57944 |
| 3           | Gaussian  | 1736.42053 | 1.47353 | 1491.82484 | 532.22241   | 13.62168 |
| 12747.47507 |           |            |         |            |             |          |

**Figure S3**

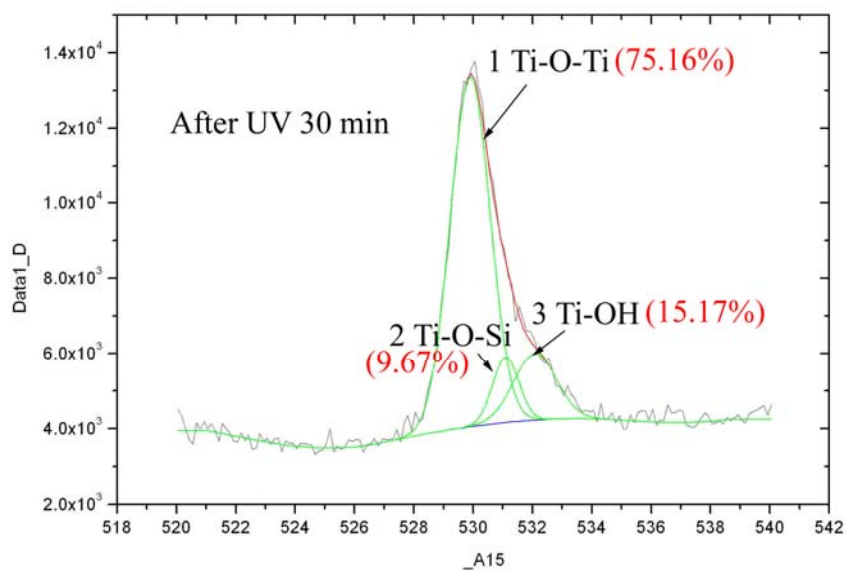

Fitting Results

| Peak #      | Peak Type | AreaFIT     | FWHM    | MaxHeight  | CenterGrvty | AreaFITP |
|-------------|-----------|-------------|---------|------------|-------------|----------|
| 1           | Gaussian  | 11520.64511 | 1.57242 | 9335.00208 | 529.89729   | 75.16094 |
| 2           | Gaussian  | 1482.47492  | 1.03512 | 1738.27634 | 531.09944   | 9.6717   |
| 3           | Gaussian  | 2324.84872  | 1.68741 | 1766.95649 | 532.08351   | 15.16736 |
| 15327.96824 |           |             |         |            |             |          |

**Figure S4**

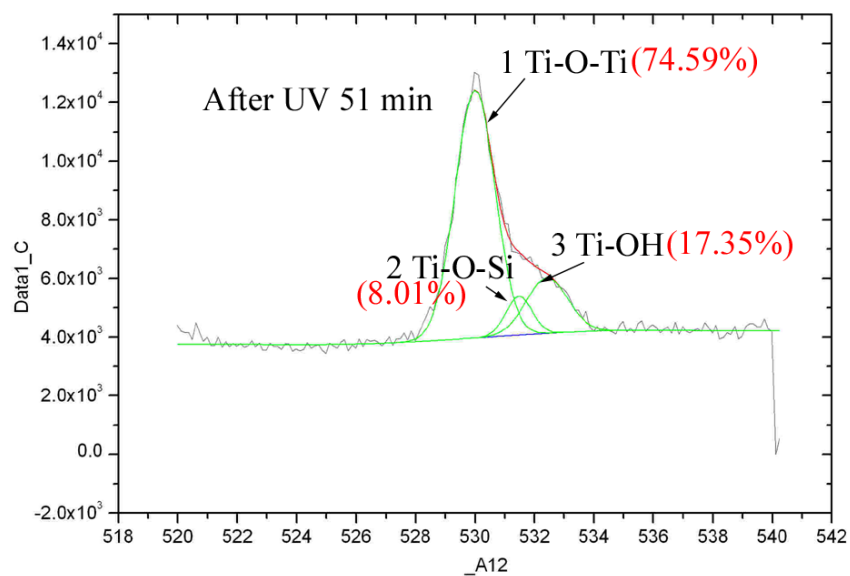

Fitting Results

| Peak # | Peak Type | AreaFIT     | FWHM    | MaxHeight  | CenterGrvty | AreaFITP |
|--------|-----------|-------------|---------|------------|-------------|----------|
| 1      | Gaussian  | 10460.32826 | 1.5768  | 8454.55028 | 529.76827   | 74.59222 |
| 2      | Gaussian  | 1129.72596  | 1.02835 | 1332.16492 | 531.24494   | 8.05604  |
| 3      | Gaussian  | 2433.29518  | 1.64536 | 1892.29957 | 532.18903   | 17.35174 |

14023.34941

XPS analysis of the superhydrophobic TiO<sub>2</sub> (O1s) before and after UV treatment for different time from 0 to 51 min. The data and the fitting results showed that the content of hydroxyl group increased with the increase of UV treatment time.
